# Supplementary material for: Advanced Se–C nanocomposites: a bifunctional electrode material for both Li–Se and Li-ion batteries
Source: Royal Society of Chemistry journal article supplement (doi:10.1039/c4ta02017k), 2014-05-23
Supplement: c4ta02017k1.pdf [file c4ta02017k1.pdf]

## Electronic Supplementary Information for

### Advanced Se/C nanocomposite: a bifunctional electrode material for both Li-Se and Li-ion batteries

Huan Ye, Ya-Xia Yin, Shuai-Feng Zhang, and Yu-Guo Guo\*

CAS Key Laboratory of Molecular Nanostructure and Nanotechnology, and Beijing National Laboratory for Molecular Sciences, Institute of Chemistry, Chinese Academy of Sciences (CAS), Beijing 100190 (P. R. China)

\*Corresponding author. E-mail: [ygguo@iccas.ac.cn](mailto:ygguo@iccas.ac.cn)

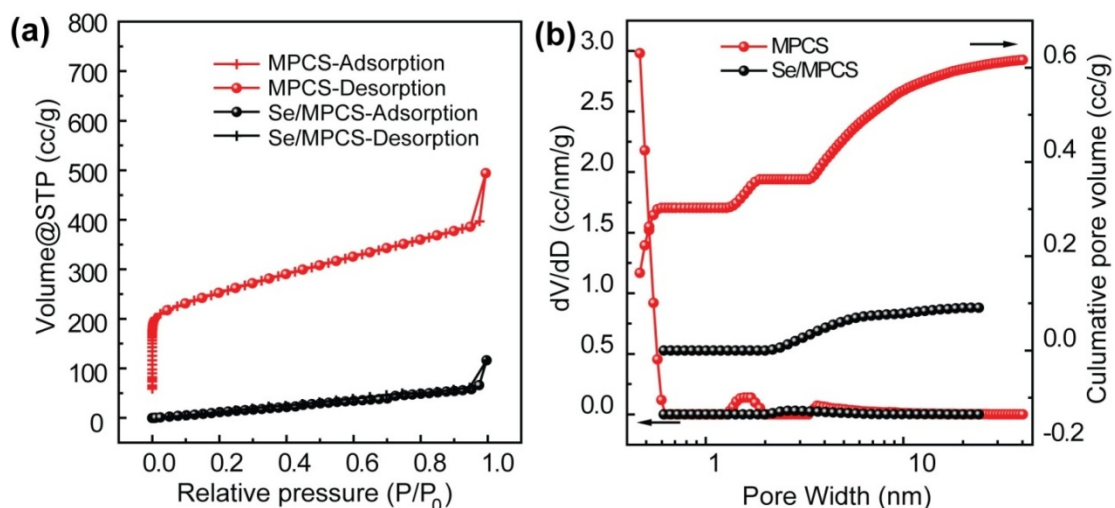

**Fig. S1.** (a) Nitrogen adsorption/desorption isotherms at 77 K of MPCS and Se/MPCS composite and (b) their pore size distributions.

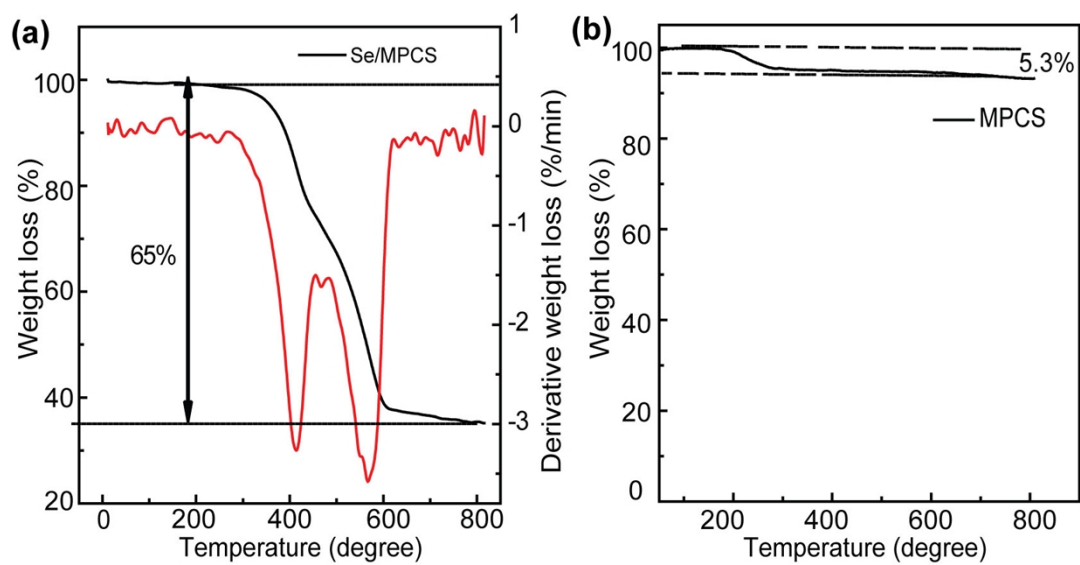

**Fig. S2.** (a) Thermalgravimetric analysis curve of Se/MPCS composite with a selenium content of 65 wt% , (b) TG analysis of MPCs.

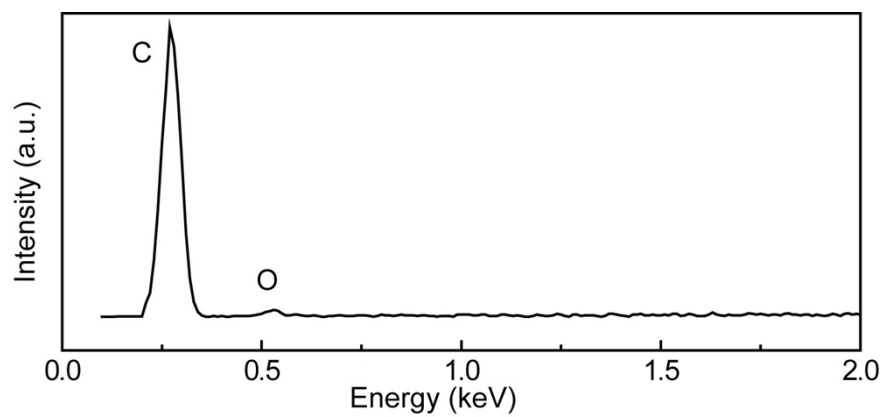

**Fig. S3.** Elemental analysis of Se/MPCS composite after TG analysis.

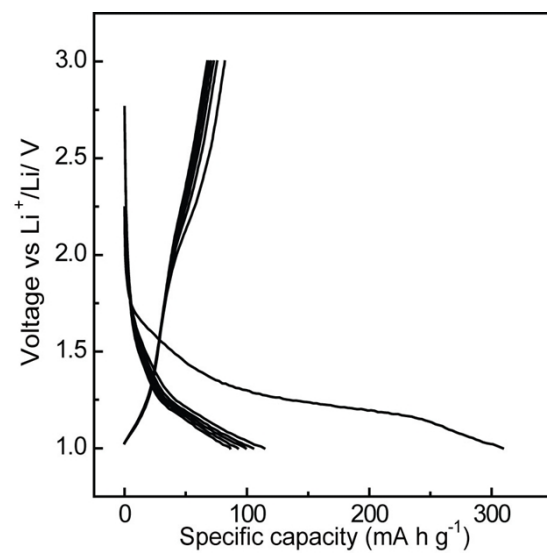

**Fig. S4** Glavanostatic charge/discharge voltage profiles of MPCS for the first 6 cycles tested at 0.1C.

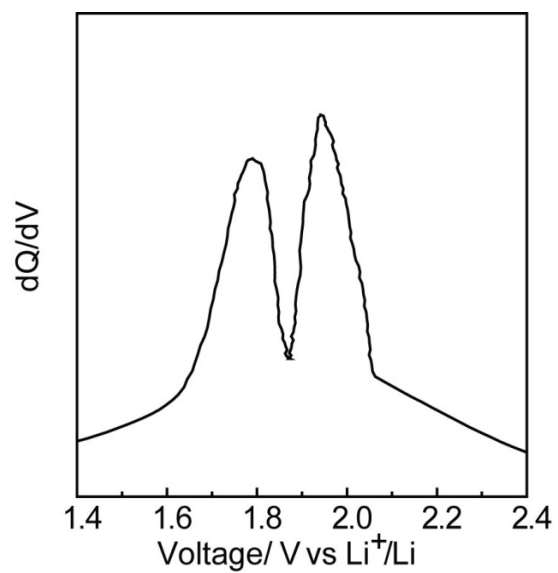

**Fig. S5.** The differential discharge capacity vs voltage curve of Se/MPCS composite electrode between 1-3 V.

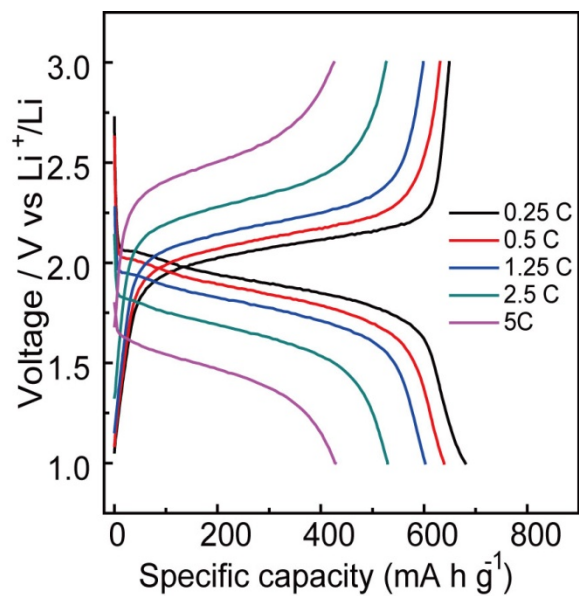

**Fig. S6.** GDC voltage profiles of the Se/MPCS electrode in the 6th cycle at different rates.

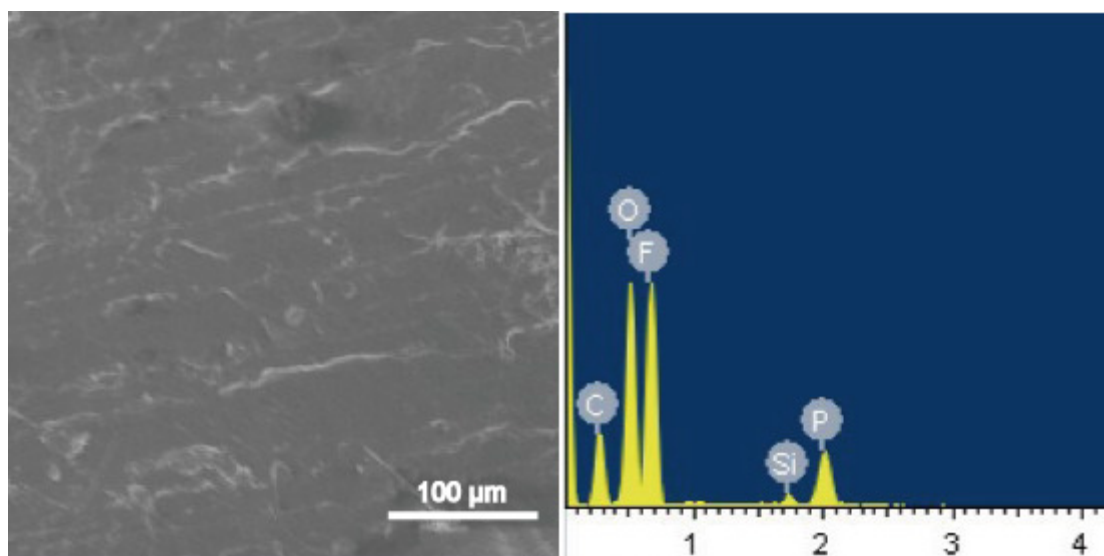

**Fig. S7.** *Ex situ* SEM characterization results of the lithium anode after 500 cycles.

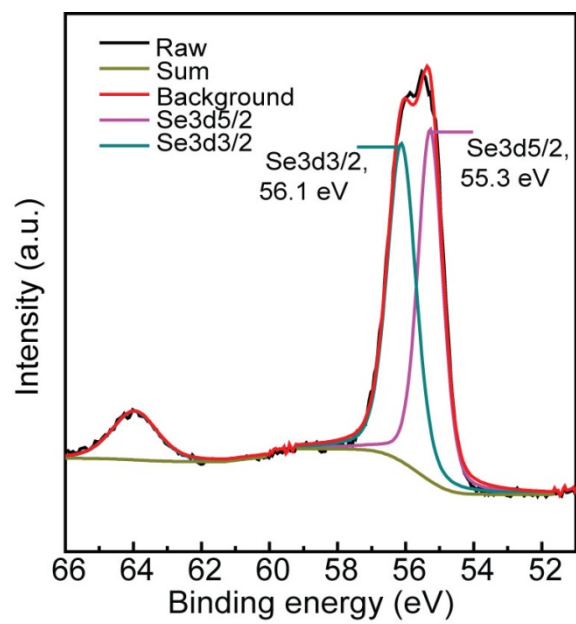

**Fig. S8.** XPS Se3d spectra of Se/MPCS composite before test.



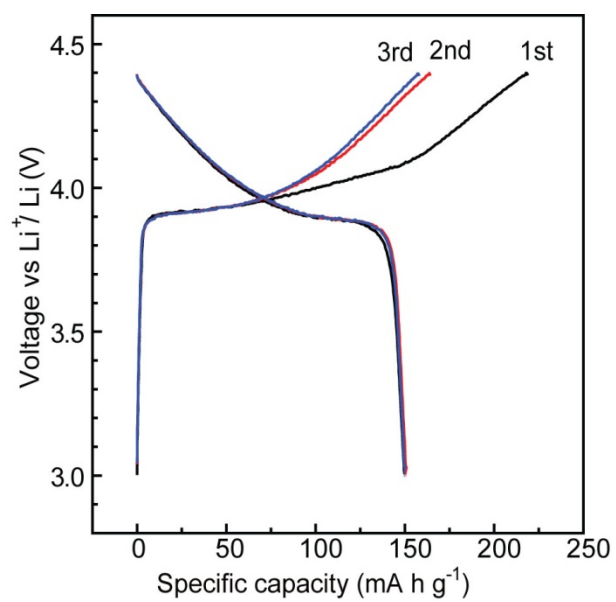

**Fig. S9.** GDC voltage profiles of NMC electrode in lithium cell at 0.2 C.

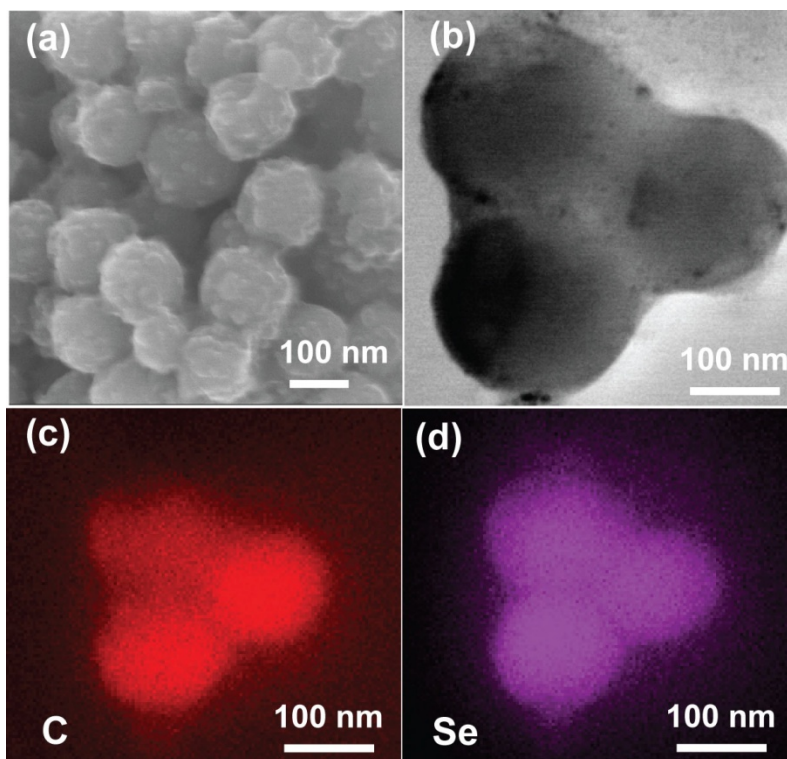

**Fig. S10.** Structural characterizations of Se/MPCS after 1000 cycles at 1 C. (a) *Ex situ* SEM image (b) annular bright-field TEM image of Se/MPCS, and EDX elemental mappings of (c) carbon and (d) selenium.
